# Supplementary material for: Reverse osmosis brine treatment using direct contact membrane distillation (DCMD): effect of membrane characteristics on desalination performance and the wetting phenomenon
Source: Royal Society of Chemistry journal article supplement (doi:10.1039/c7ew00468k), 2018-01-01
Supplement: c7ew00468k1.pdf [file c7ew00468k1.pdf]

**Reverse osmosis brine treatment using direct contact membrane distillation  
(DCMD): Effect of membrane characteristics on desalination performance  
and wetting phenomenon**

*Supplementary information*

Zhongsen Yan, Haiyang Yang, Huarong Yu, Fangshu Qu\*, Heng Liang, Guibai Li

*State Key Laboratory of Urban Water Resource and Environment (SKLUWRE), Harbin Institute of Technology,  
Harbin, 150090, P.R. China*

\*Corresponding author.

Tel.: +86 451 86282252; Fax: +86 451 86282252.

E-mail address: [qufangshu@163.com](mailto:qufangshu@163.com) (Fangshu Qu)

## LEP measurement

The membrane was fixed on the filtration cell. Both filtration tank and outlet were pre-filled with water. Outlet was connected to the tank on the electronic balance. Air was pumped to the cell by a persistent pump with the control of Arduino programming controller. Pressure of air side was increased by the step of 2 kPa. Each step lasted 1 min. Membrane was wetted when the value of electronic balance keeps rising, and pressure in this time equal to the  $LEP_p$ . Fig. of LEP measurement setup was shown in the Fig. S1.

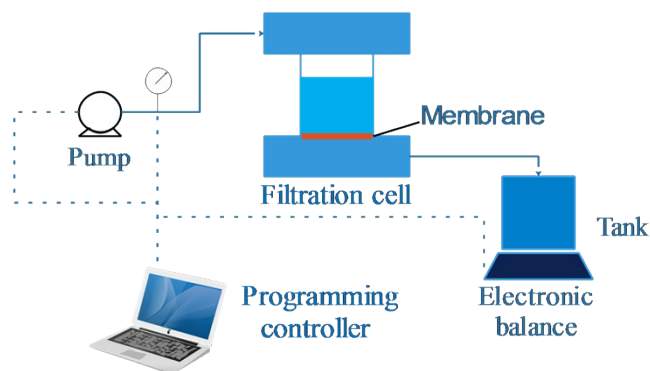

Fig. S1 LEP measurement setup

Table S1 Process data of porosity measurement

|      | Volume (cm <sup>3</sup> ) | Membrane weight (g) | Total weight (g) | porosity |
|------|---------------------------|---------------------|------------------|----------|
| GVHP | 0.4732                    | 0.2991              | 0.6302           | 70%      |
|      | 0.4883                    | 0.3168              | 0.6355           | 65%      |
|      | 0.4876                    | 0.3174              | 0.6660           | 71%      |
|      | 0.4761                    | 0.3009              | 0.6464           | 73%      |
| BVSP | 0.5706                    | 0.3099              | 0.7150           | 71%      |
|      | 0.5411                    | 0.2908              | 0.6900           | 74%      |
|      | 0.5594                    | 0.3005              | 0.7080           | 73%      |
|      | 0.5536                    | 0.2977              | 0.7020           | 73%      |
| SVSP | 0.4913                    | 0.3376              | 0.6545           | 65%      |
|      | 0.4833                    | 0.3348              | 0.6486           | 65%      |
|      | 0.5010                    | 0.3368              | 0.6360           | 60%      |
|      | 0.5025                    | 0.3366              | 0.6780           | 68%      |

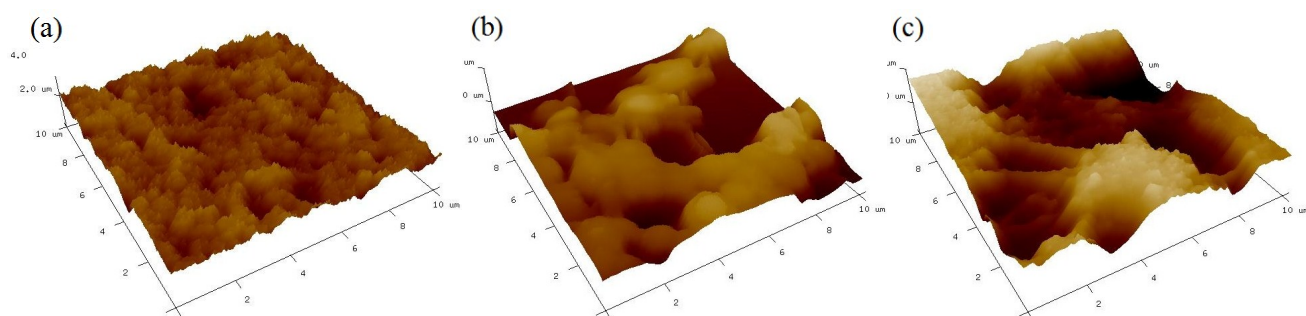

Fig. S2 Three-dimensional AFM surface images of the virgin membranes (a) GVHP, (b) BVSP, (c) SVSP

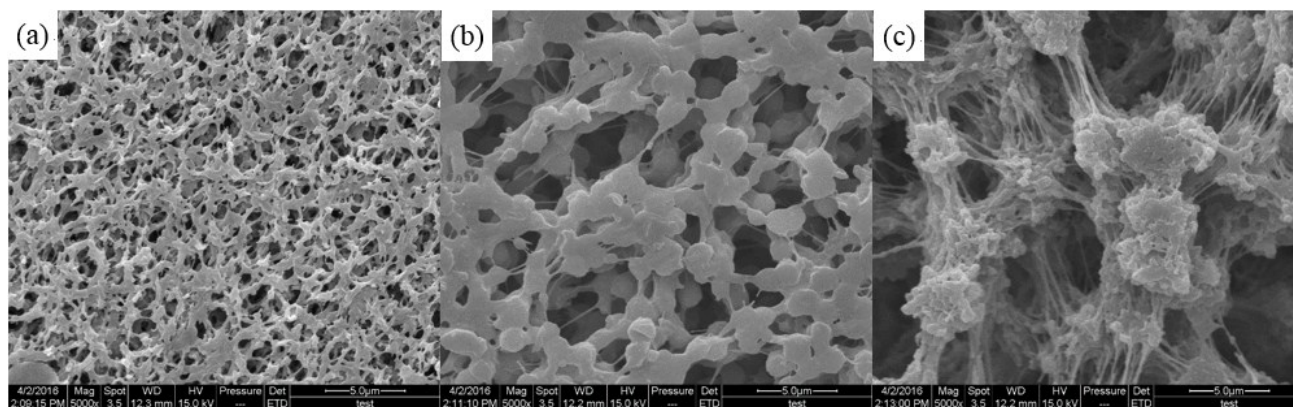

Fig. S3 SEM images of the virgin membranes (a) GVHP, (b) BVSP, (c) SVSP

Table S2 Ions rejections during RO brine treatment using three types of MD membranes (CF=3)

|              | Membrane | K <sup>+</sup> | Na <sup>+</sup> | Ca <sup>2+</sup> | Mg <sup>2+</sup> | Cl <sup>-</sup> | SO <sub>4</sub> <sup>2-</sup> |
|--------------|----------|----------------|-----------------|------------------|------------------|-----------------|-------------------------------|
| First Stage  | GVHP     | 100.00%        | 100.00%         | 100.00%          | 100.00%          | 100.00%         | 100.00%                       |
|              | BVSP     | 99.99%         | 99.99%          | 99.99%           | 99.97%           | 99.99%          | 99.99%                        |
|              | SVSP     | 99.98%         | 99.99%          | 99.98%           | 99.96%           | 99.98%          | 99.99%                        |
| Second Stage | GVHP     | 99.99%         | 99.99%          | 99.99%           | 99.99%           | 99.99%          | 99.99%                        |
|              | BVSP     | 99.97%         | 99.98%          | 99.98%           | 99.97%           | 99.99%          | 99.99%                        |
|              | SVSP     | 99.97%         | 99.97%          | 99.95%           | 99.95%           | 99.97%          | 99.97%                        |
